# Supplementary material for: Ultrasmall Glucose-Functionalized Au-Carbon Nanohybrids: Exploiting the Warburg Effect to Image Tumors by Multimodal CT/Fluorescence Imaging
Source: MDPI journal article supplement (doi:10.3390/c10020035), 2024-04-04
Supplement: s1 [file s1]

## Supplementary information

# Ultrasmall Glucose-Functionalized Au-Carbon Nanohybrids: Exploiting the “Warburg Effect” to image Tumors by Multimodal CT/Fluorescence Imaging

Roberta Cillari <sup>1</sup>, Sergio Scirè <sup>1</sup>, Gennara Cavallaro <sup>1</sup> and Nicolò Mauro <sup>1,\*</sup>

<sup>1</sup> Laboratory of Biocompatible Polymers, Department of “Scienze e Tecnologie Biologiche, Chimiche e Farmaceutiche” (STEBICEF), University of Palermo, Via Archirafi, 32 90123 Palermo, Italy

\*Correspondence: nicolo.mauro@unipa.it; Tel.: +3909123891908

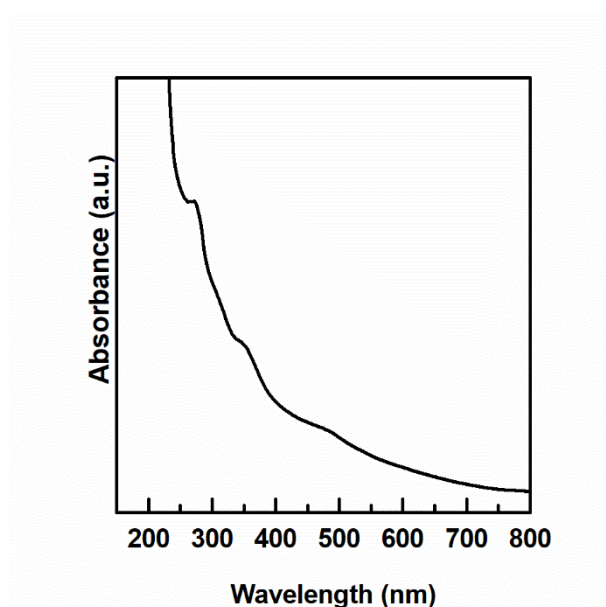

**Figure S1. UV-Vis absorption spectrum of gold seed solution.** The analysis was performed in the 200-800 nm range.

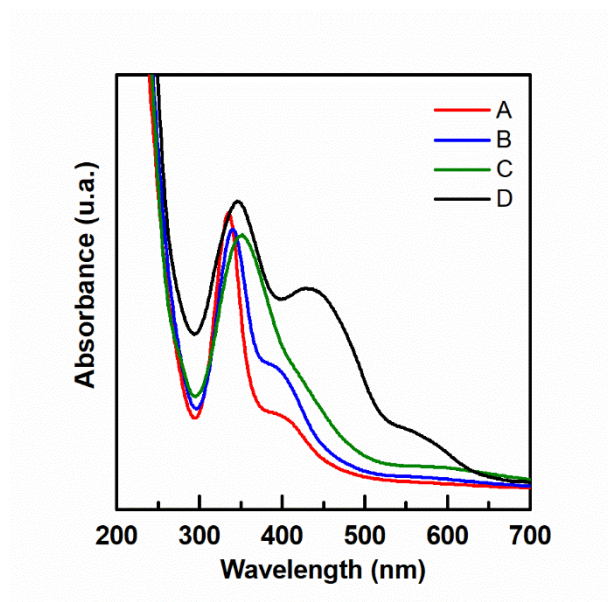

**Figure S2. UV-Vis absorption spectra of the size exclusion chromatography collected fractions (A-D) during the purification process of AuCDs.** Samples were prepared as aqueous solutions, and the analysis was performed in the 200-700 nm range. AuCDs = Fraction D.

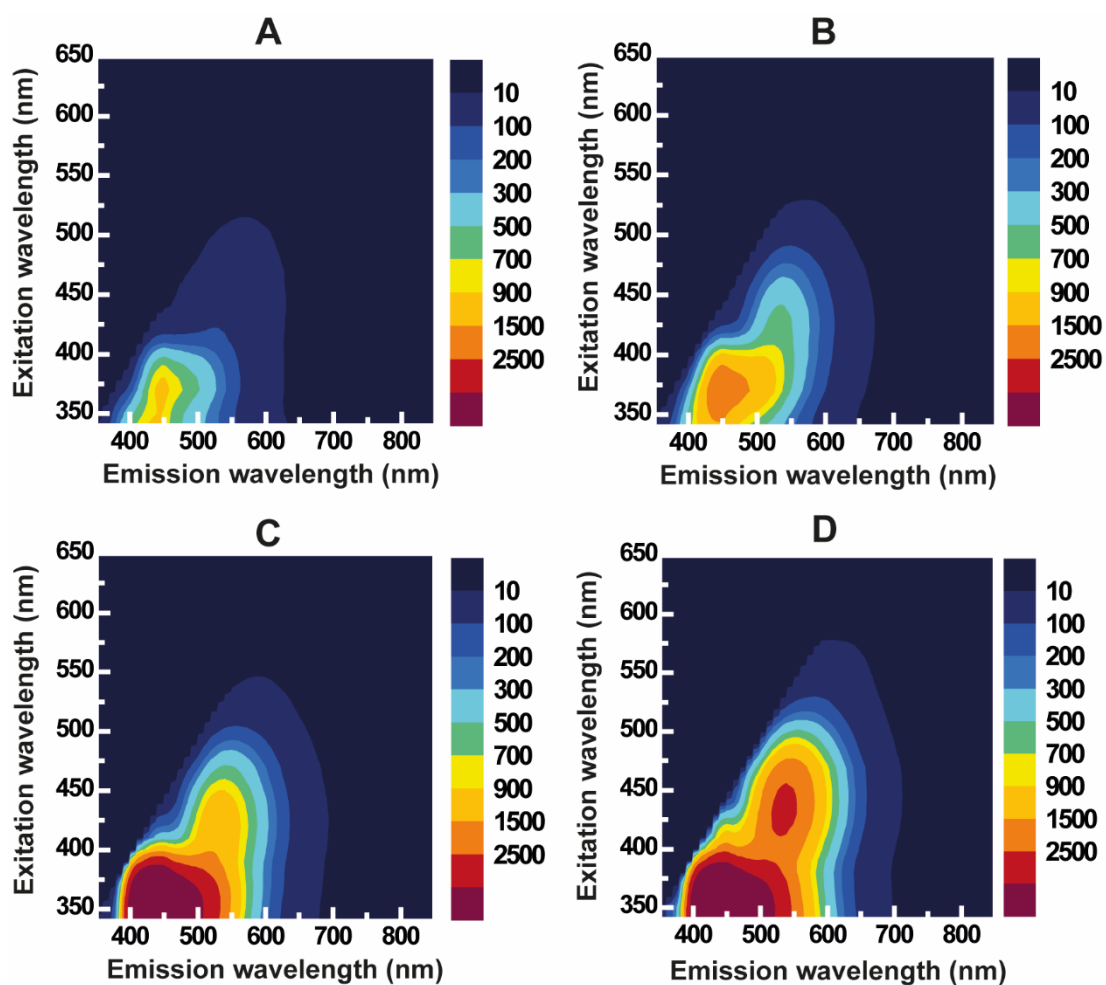

**Figure S3. 3D fluorescence emission spectra of fractions (A-D) collected during the purification process of AuCDs.** Samples were prepared as aqueous solution. Fluorescence emission spectra were recorded in the 360 – 850 nm range ( $\lambda_{\text{ex}}$  350 – 650 nm).

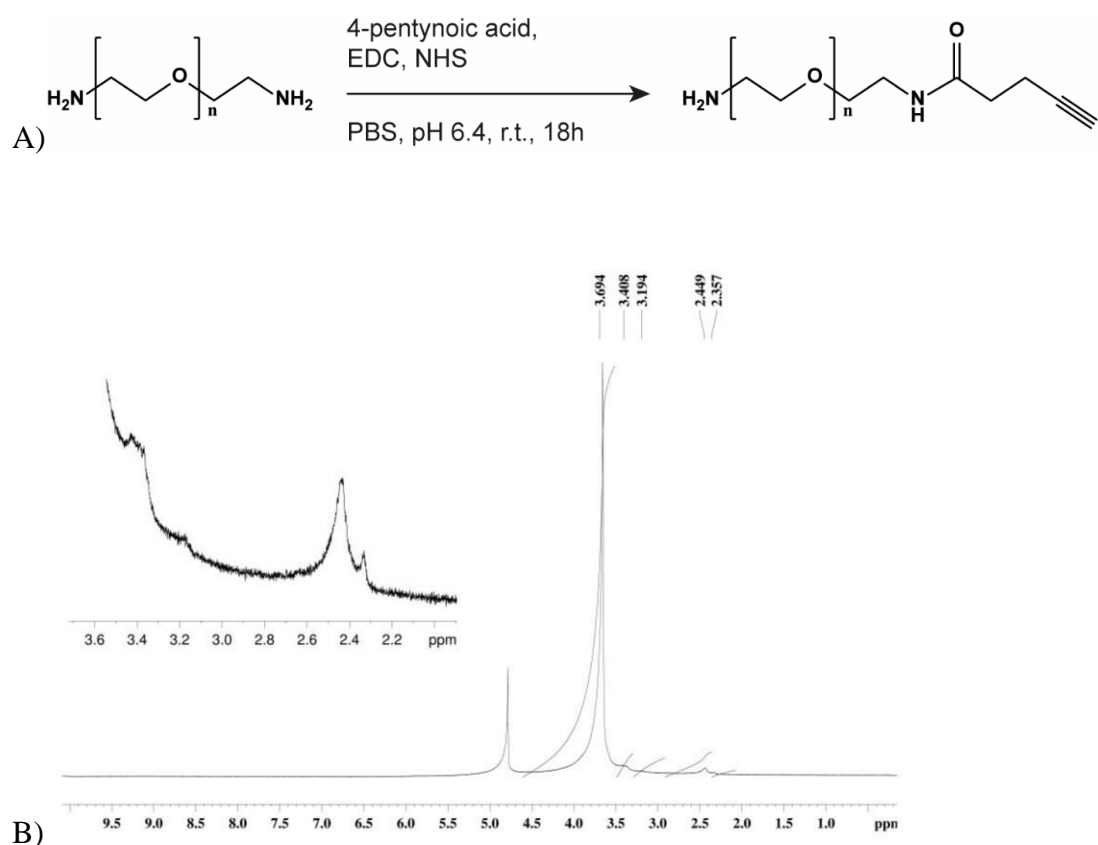

**Figure S4. Synthesis of the amino-PEG-alkyne (NH<sub>2</sub>-PEG-CC).** Synthetic pathway adopted for the synthesis of the NH<sub>2</sub>-PEG-CC (A). <sup>1</sup>H NMR spectrum in D<sub>2</sub>O (300 MHz) (B).
